# Supplementary material
Source: PubMed Central journal article supplement (PMC5087723)
Supplement: 10.1074_M116.754671_jbc.M116.754671-1.pdf [file 10.1074_M116.754671_jbc.M116.754671-1.pdf]

# Supplemental Materials

## **Dynamics of thrombin generation and flux from clots during whole human blood flow over collagen/tissue factor surfaces.**

**Shu Zhu, Yichen Lu, Talid Sinno, and Scott L. Diamond<sup>1</sup>**

From Institute for Medicine and Engineering  
Department of Chemical and Biomolecular Engineering  
University of Pennsylvania  
Philadelphia, Pennsylvania 19104

<sup>1</sup>To whom correspondence should be addressed: Dr. Scott L. Diamond, Institute for Medicine and Engineering, 1024 Vagelos Research Laboratories, 3340 Smith Walk, University of Pennsylvania, Philadelphia, PA 19104, Telephone: (215) 573-5702; FAX: (215) 273-6815; Email: sld@seas.upenn.edu

Running title: Thrombin flux from clots formed under flow

Key words: platelet, hemostasis, thrombosis, diffusion, convection, thrombin

**Figure S1**

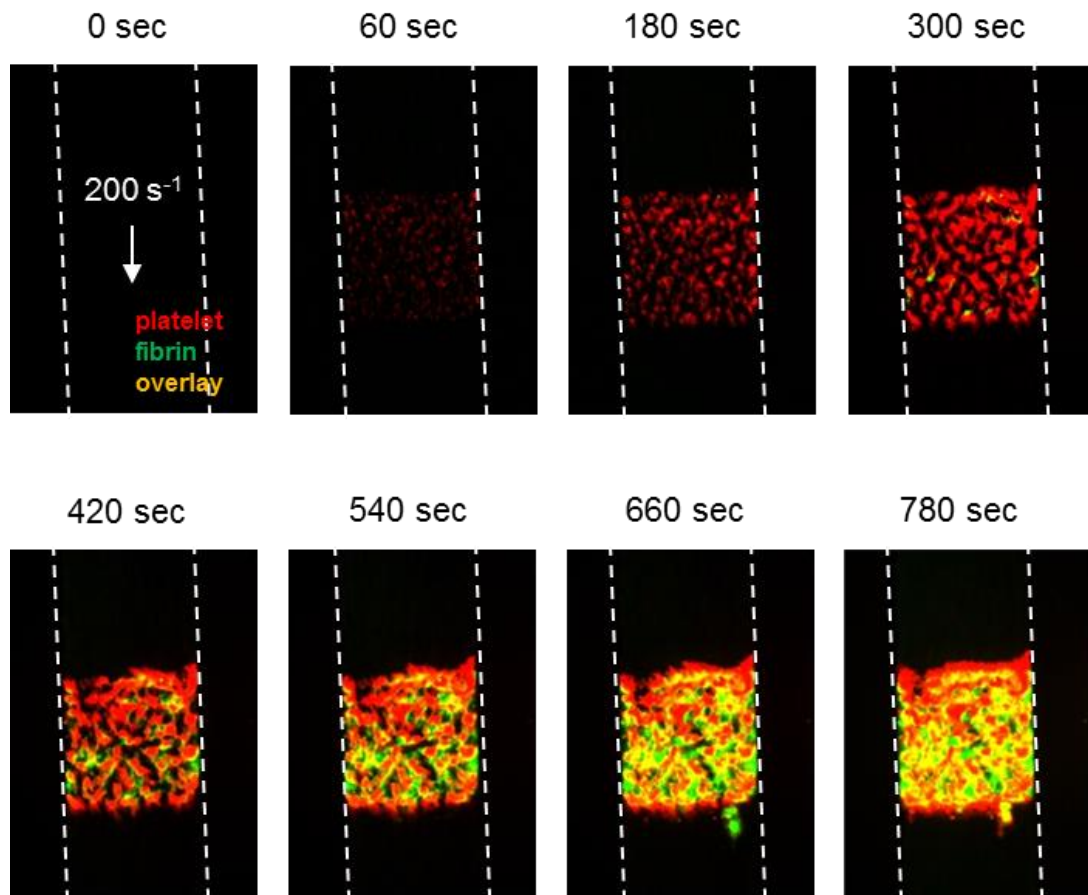

**Fig. S1. Platelet aggregation and fibrin formation on collagen/TF.** Platelet deposition (red) and fibrin formation (green) at indicated time points during blood perfusion (40  $\mu\text{g}/\text{mL}$  CTI) over collagen/TF (1 molec/ $\mu\text{m}^2$ ). Initial wall shear rate = 200 s<sup>-1</sup>. Flow direction: top to bottom. Dashed lines outline flow channels.

**Figure S2**

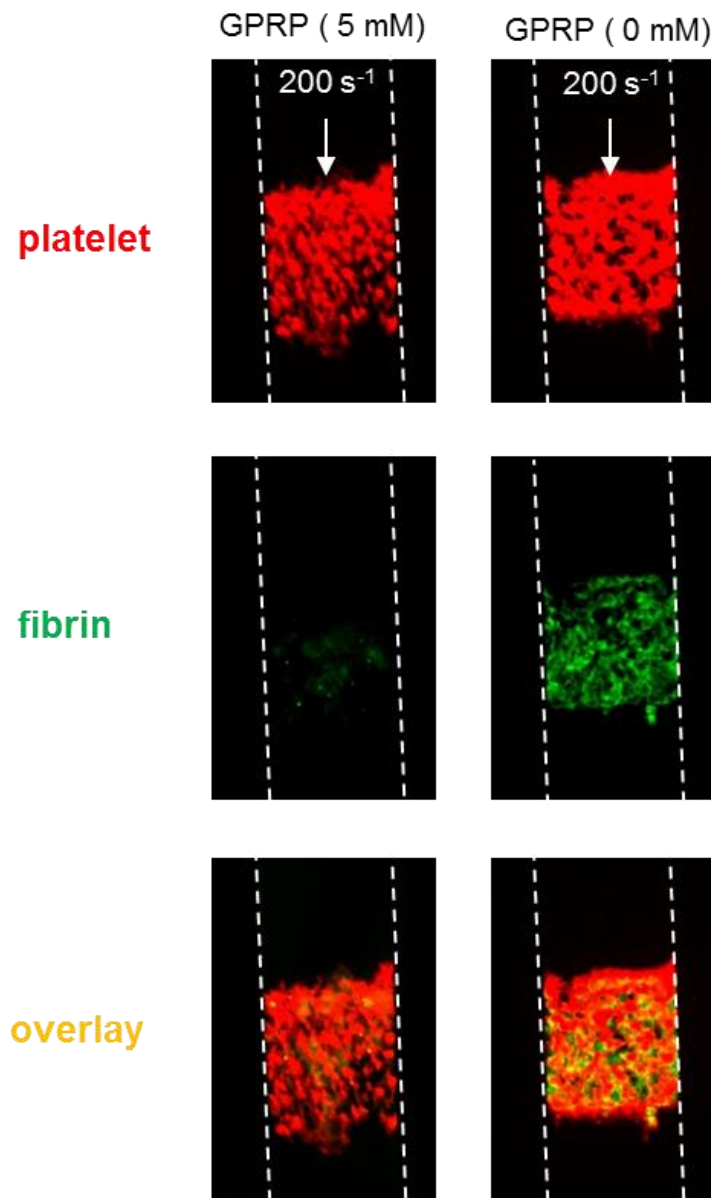

**Fig. S2. Substantial inhibition of fibrin polymerization by GPRP under flow.** GPRP (5 mM) blocked most, but not all, fibrin polymerization during blood perfusion (40  $\mu\text{g}/\text{mL}$  CTI) over collagen/TF (1 molec/ $\mu\text{m}^2$ ) at an initial wall shear rate of 200  $\text{s}^{-1}$ . Fluorescent images were taken at the end of experiments ( $t = 800$  sec). Flow direction: top to bottom. Dashed lines outline flow channels.
